# Supplementary material
Source: Springer Nature journal article supplement (https://www.springermedizin.de/resource/supplementary/12913_2012_2251_MOESM12_ESM.pdf/9530064)

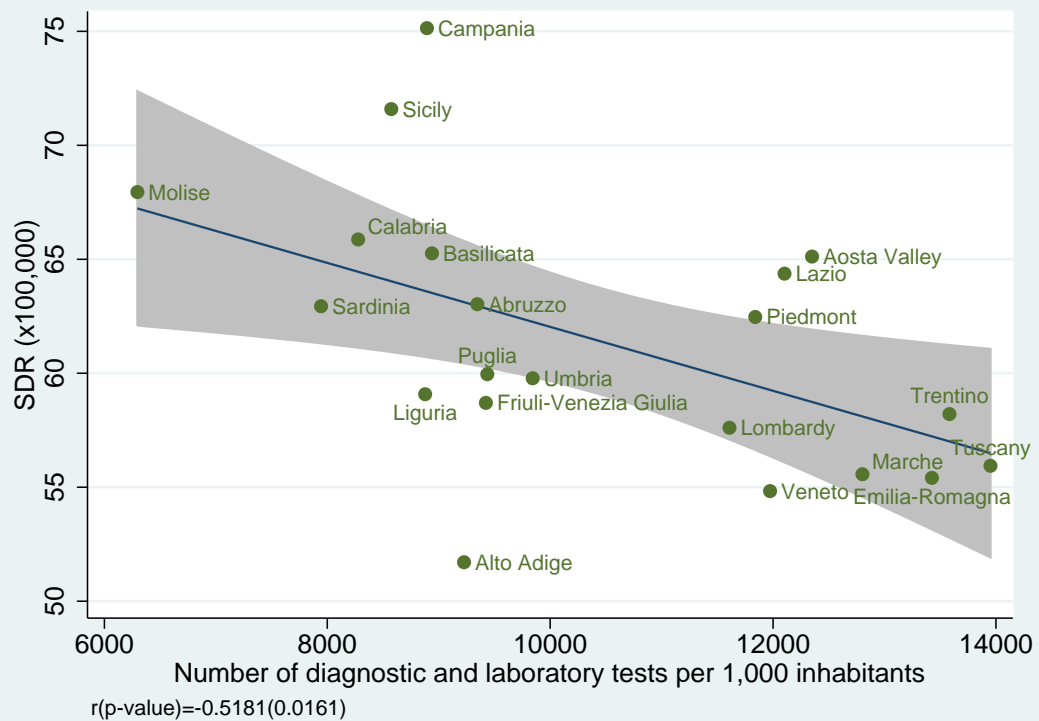

$r(p\text{-value})=-0.5181(0.0161)$

Supplement: MOESM12 [file 9530064]
